## RESEARCH ARTICLE

# A mechanogenetic role for the actomyosin complex in branching morphogenesis of epithelial organs

Jin Man Kim<sup>1,‡</sup>, YoungJu Jo<sup>2,\*</sup>, Ju Won Jung<sup>3</sup> and Kyungpyo Park<sup>4,‡</sup>

## ABSTRACT

The actomyosin complex plays crucial roles in various life processes by balancing the forces generated by cellular components. In addition to its physical function, the actomyosin complex participates in mechanotransduction. However, the exact role of actomyosin contractility in force transmission and the related transcriptional changes during morphogenesis are not fully understood. Here, we report a mechanogenetic role of the actomyosin complex in branching morphogenesis using an organotypic culture system of mouse embryonic submandibular glands. We dissected the physical factors arranged by characteristic actin structures in developing epithelial buds and identified the spatial distribution of forces that is essential for buckling mechanism to promote the branching process. Moreover, the crucial genes required for the distribution of epithelial progenitor cells were regulated by YAP and TAZ through a mechanotransduction process in epithelial organs. These findings are important for our understanding of the physical processes involved in the development of epithelial organs and provide a theoretical background for developing new approaches for organ regeneration.

**KEY WORDS:** Branching morphogenesis, Cytoskeleton, Actomyosin contractility, Mechanotransduction, Submandibular gland

## INTRODUCTION

The actin-myosin complex plays crucial roles in supporting various biological phenomena. The actomyosin network is first and most widely known as a functional unit for muscle contraction. In non-muscle cell types, this cytoskeletal assembly generates a mechanical force that primarily triggers diverse cellular functions, such as cell migration, mitosis and shape changes (Gorfinkel and Blanchard, 2011). At the tissue and organ level, the actomyosin complex in the cell cortex mainly supports epithelial architectures, by balancing the forces generated by E-cadherin and the integrin family, and, thus, maintains tissue integrity and structural homeostasis in diverse

epithelial organs (Guillot and Lecuit, 2013). The physical balance can be interrupted by a signaling input that induces morphogenesis, which is an exquisitely designed genetic program with complex spatiotemporal patterns. Under such circumstances, myosin acts as a force generator by interacting with cortical actin fibers; this contributes to the translation of the different types of forces into macroscopic changes in epithelial layers, resulting in organ deformation (Guillot and Lecuit, 2013; Maruthamuthu et al., 2010).

Besides the physical functions, the actomyosin complex is involved in mechanotransduction, in which extra/intercellular physical patterns are decoded into the perturbation of intracellular signaling pathways. In this process, the Yes-associated protein (YAP) and transcriptional co-activator with PDZ-binding motif (TAZ) open a new avenue for the interpretation of the mechanical-to-genetic changes. The stiffness of the extracellular matrix (ECM) and the shape changes in mammary epithelial cells regulate YAP and TAZ activity through a mechanism independent of the Hippo pathway, and this response determines the proliferation-differentiation switch of the cells (Dupont et al., 2011). Moreover, mechanically regulated YAP and TAZ activity was found to be pivotal for determining the differentiation fate of mesenchymal stem cells, ranging from osteocytes to adipocytes, according to the surrounding environment (Dupont et al., 2011; Engler et al., 2006). Upon both biological and physical stimulation, YAP and TAZ regulate their transcriptional activities through a nucleus-cytoplasm shuttling process. Nuclear YAP and TAZ proteins make a functional complex with diverse binding partners, especially with the TEA domain (TEAD) transcription factors, to establish core DNA-binding platforms (Vassilev et al., 2001). Such a versatile combination of complexes enables the dissemination of the genetic effect into broad biological contexts. The primordial cells in epithelial organs also show spatially patterned actomyosin foci, indicating that dynamic forces fluctuate throughout the developing structures (He et al., 2010; Rauzi et al., 2010). However, the exact role of the physical patterns and their relationship to the YAP and TAZ activity in the transcriptional changes during morphogenesis are not fully understood.

Branching morphogenesis is a crucial event for the morphological patterning that occurs in the initial process of epithelial organ development. The repetitive branching process of epithelial buds establishes the complex architectures that guarantee an efficient exchange of various molecules (e.g. nutrients and gases) with the mesenchymal components (Affolter et al., 2003).

The epithelial organs – the lung, kidney, pancreas, mammary gland and salivary gland – develop their own morphologies, although they share cognate extra/intracellular components for the genetic program (Lu and Werb, 2008). One plausible explanation for the morphological differences is the spatiotemporal differences of the components among the organs, which in turn guide the different epithelial architectures by regulating the cellular properties, such as the cell polarity, mitotic axis and location

<sup>1</sup>Department of Oral Microbiology and Immunology, School of Dentistry and Dental Research Institute, Seoul National University, Seoul 08826, Republic of Korea.

<sup>2</sup>Department of Physics, Korea Advanced Institute of Science and Technology (KAIST), Daejeon 34141, Republic of Korea. <sup>3</sup>Department of Dentistry, CHA Bundang Medical Center, CHA University School of Medicine, Seongnam 13496, Republic of Korea. <sup>4</sup>Department of Physiology, School of Dentistry and Dental Research Institute, Seoul National University, Seoul 03080, Republic of Korea.

\*Present address: Department of Applied Physics, Stanford University, Stanford, CA 94305, USA.

‡Authors for correspondence (kppark@snu.ac.kr; jinmankim@snu.ac.kr)

© J.M.K., 0000-0002-4751-7125; Y.J.J., 0000-0002-2364-7160; J.W.J., 0000-0003-4292-9160

Handling Editor: Thomas Lecuit

Received 19 March 2020; Accepted 19 February 2021

(Tang et al., 2011). In branching morphogenesis, actomyosin contractility is known as an important physical factor (Kim and Nelson, 2012). Distinct patterns have been reported for the actin cytoskeleton in developing epithelial buds according to the organ type (Ewald et al., 2008; Kim et al., 2015; Meyer et al., 2004), indicating that a locally concentrated force was established during the process. Moreover, perturbation of the actomyosin contractility results in impaired morphogenesis in diverse organs (Daley et al., 2009; Moore et al., 2005). Given evidence strongly suggests the importance of the mechanical factors in organ morphogenesis, an investigation of the physical effect on the developmental process could provide key information for our understanding of the core principle of organ shape patterning.

Here, we report the physical and genetic role of the actomyosin complex in the initial process of branching morphogenesis using an *ex vivo* epithelial organ explant culture system. Through the use of versatile techniques for the live imaging of developing organs, we found that the physical tension arranged by characteristic actin structures is essential for sculpturing the epithelial branching patterns. Moreover, the intercellular forces induce a YAP and TAZ-mediated mechanotransduction pathway, which maintains genes that are crucial for the expansion of epithelial progenitor cells.

## RESULTS

### Characteristic F-actin patterns in diverse epithelial organs

To investigate the role of the actomyosin complex in branching morphogenesis, we first screened filamentous actin (F-actin) patterns in diverse organotypic cultures undergoing active branching. Phalloidin staining revealed locally concentrated patterns in the distal or peripheral area of epithelial buds, but the range and intensity were varied depending on bud shape (Fig. S1A). Broad and high signal patterns of F-actin were detected in organs showing lobular form (e.g. pancreas and salivary glands), whereas the high signal patterns were concentrated on the narrow area of epithelial curvature in tube-forming organs (e.g. kidney and lung) (Fig. S1A-C). There was no clear spatial difference of staining pattern in the organ with minimal architectural changes (e.g. tooth germ; Fig. S1A-C). This tendency highlights the potential importance of the spatial distribution of cytoskeleton in determining morphological characteristics. We then used an isolated culture model of the epithelial rudiment of mouse embryonic submandibular gland (epiSMG) (Nogawa and Takahashi, 1991), in which visualization and perturbation of the signaling activities during developmental processes is feasible. epiSMG cultures showed concentrated F-actin patterns on the cell cortices in the outermost epithelial layers when compared with the even signal distribution of cell membrane tracer (DiD) (Fig. 1A). The peripheral actin signals of epithelial buds were significantly higher compared with those in the central and pericleft areas ( $P=8.04\times 10^{-11}$  and  $1.34\times 10^{-10}$ ; Fig. 1B). The formation of peripheral actin patterns was apparent from embryonic day (E) 13, coincident with the initiation of cleft and bud formation (Fig. S1D). The concentrated actin patterns were more densely assembled and were maintained during the active morphogenic stage of epithelial buds (E14-15) (Fig. S1D). The functionality of the actin network was demonstrated by the colocalization of F-actin with phosphorylated myosin (pMyosin) (Fig. S1E,F). The peripherally concentrated F-actin and pMyosin patterns were additionally confirmed in the sectioned SMG samples (Fig. S1G) to avoid any biases from optical and chemical penetration problems. Moreover, we could not observe clear apico-basal difference in pMyosin signals in peripheral epithelial cells, which induces spontaneous

curvature formation of epithelial organs (Fig. S1H). These data indicate that peripheral actomyosin complexes establish spatially distinct intercellular force distribution in developing epithelial buds.

### Morphological changes in epithelial buds upon perturbation of actomyosin contractility

We next treated SMG cultures with blebbistatin (a myosin ATPase inhibitor) to disrupt actomyosin contractility in epithelial cells and monitored the morphological changes. Blebbistatin-treated SMGs and epiSMG cultures showed a remarkable architectural distortion of the epithelial buds, reminiscent of multiple bud formation (Fig. 1C). Through quantification of morphological parameters, we discovered that three points characterize the morphological distortion: shallower cleft depth [ $89.55\pm 9.35\ \mu\text{m}$  (control) versus  $33.42\pm 2.74\ \mu\text{m}$  (blebbistatin);  $P=4.38\times 10^{-6}$ ], increased bud numbers ( $5.71\pm 0.45$  versus  $37.00\pm 1.92$ ;  $P=5.85\times 10^{-7}$ ) and enlarged organ size ( $6.36\pm 0.60\times 10^4\ \mu\text{m}^2$  versus  $8.35\pm 0.42\times 10^4\ \mu\text{m}^2$ ;  $P=0.01$ ) (Fig. 1D). The morphological alteration by blebbistatin showed dose-dependent patterns (Fig. 1E,F). Inhibiting actin polymerization with a low concentration of cytochalasin D treatment (100 nM) also resulted in similar morphological changes in the cultures (Fig. S1I).

Next, we investigated the epithelial morphology of developing buds at the single-cell level, by optically sectioning images of the midplane of each bud, showing maximum diameter (Fig. S2A). In the control group, epithelial cells in the peripheral sheet presented columnar features with highly polarized cells (aspect ratio= $2.194\pm 0.09$ ; Fig. 2A-C and Fig. S2B). The relaxing of intercellular tension by blebbistatin transformed the cell morphology to a cuboidal shape (aspect ratio= $1.65\pm 0.09$ ; Fig. 2C) and increased the cell area [ $37.19\pm 3.99\ \mu\text{m}^2$  (control) versus  $52.21\pm 2.62\ \mu\text{m}^2$  (blebbistatin); Fig. 2D], but intrinsic cell polarity (marked by Golgi complex localization) was not affected (Fig. S2G). The typical columnar morphology of the peripheral cells is formed by an apico-basal contraction force and intercellular junctional integrity, which alter cell shape with a high aspect ratio (Hannezo et al., 2014). This background could provide a plausible explanation for the morphological changes: blebbistatin treatment impeded circumferential contractility in the cell cortex, but did not affect intercellular junctions (Fig. S2C), resulting in cuboidal-shaped cells. These results were confirmed through genetic perturbation of myosin function by expressing nonphosphorylatable mutants of the myosin regulatory light chain (MRLC-AA) (Vicente-Manzanares et al., 2008) in epiSMG cultures. MRLC-AA-expressing cells presented a lower aspect ratio ( $1.83\pm 0.07$ ) and increased cell area compared with controls (without expression) and EGFP-expressing cells (Fig. 2E-G). We additionally quantified the aspect ratio of the peripheral and central cells in both experimental setups for actomyosin perturbation [control (-BB) versus blebbistatin treatment (+BB) and MLC-AA- versus MLC-AA+ cells]. In the control groups (-BB and MLC-AA-), peripheral cells presented a significantly higher aspect ratio than central cells, whereas the discrepancies of the aspect ratio between peripheral and central cells were clearly reduced in actomyosin-perturbed groups (+BB and MLC-AA+) (Fig. S2D). Moreover, MLC-AA-expressing (MLC-AA+) cells and blebbistatin-treated cells (+BB) showed similar morphological changes compared with each control group – the significant decrease in the aspect ratio occurred in peripheral cells, but not in central cells (Fig. S2E). Moreover, the aspect ratio of peripheral cells was significantly higher compared with cells in the central and pericleft regions (Fig. S2F), which completely matched the F-actin density patterns (Fig. 1B). Collectively, the single-cell geometric data indicate that peripheral

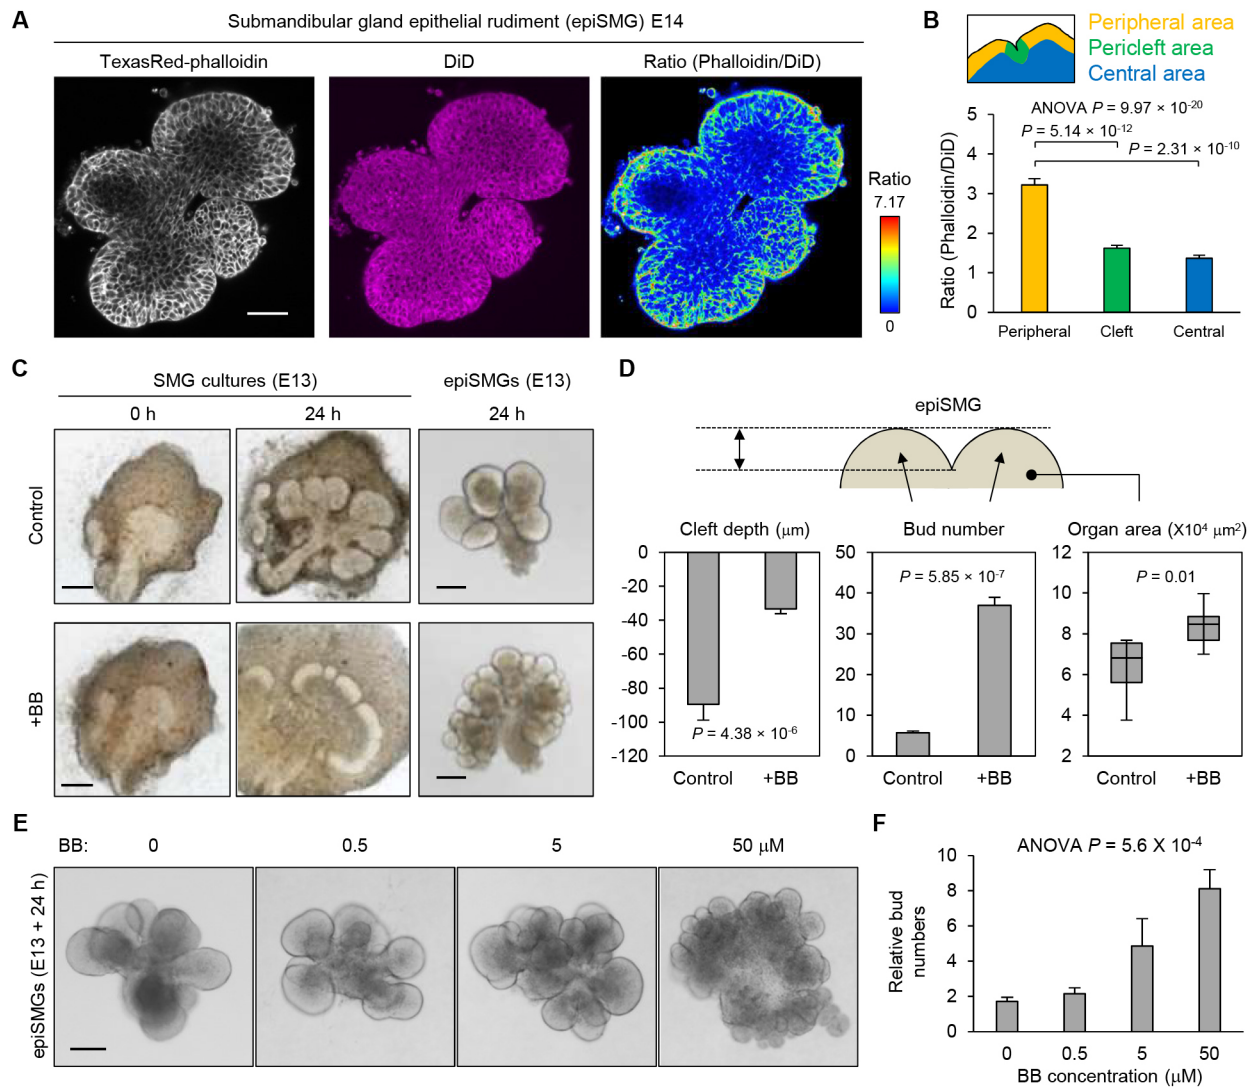

**Fig. 1. Characteristic F-actin patterns in diverse epithelial organs.** (A) F-actin (TexasRed-phalloidin, left), lipophilic tracking dye (DiD, middle) and ratio (phalloidin/DiD, right) images of epithelial rudiment cultures of mouse embryonic submandibular gland (epiSMG). (B) Upper panel: scheme for different regions of epithelial buds. Lower panel: graph of relative signals (phalloidin/DiD) present in epithelial cells from different regions of epiSMG cultures. Data are mean $\pm$ s.e.m.  $n=24$  cells per group. (C) Morphological changes in mouse embryonic SMG (left) and epiSMG (right) cultures upon 50  $\mu\text{M}$  blebbistatin treatment (+BB). (D) The changes in cleft depth [ $n=21$  (control),  $n=32$  (+BB)], bud number ( $n=7$  SMGs per group) and organ area ( $n=7$  SMGs per group) in epiSMG cultures after 50  $\mu\text{M}$  blebbistatin treatment. Data are mean $\pm$ s.e.m. (cleft depth and bud number). For organ area, box plots show maximum-minimum range (bars), upper and lower quartiles (rectangles), and median value (horizontal line). (E) Morphological changes in epiSMG cultures upon treatment with diverse concentrations of blebbistatin (~0–50  $\mu\text{M}$ ). (F) The changes in bud number in epiSMG cultures after blebbistatin treatment. Data are mean $\pm$ s.e.m.  $n=4$  SMGs per group. Scale bars: 50  $\mu\text{m}$ .

epithelial layers experience concentrated force generated by circumferential actomyosin contractility and that cleft formation results in de-stressing of the concentrated force. It is noteworthy that there is a limitation with respect to interpretation of the results, owing to absence of the data directly measuring intracellular forces; therefore, we could not conclude whether this force is applied actively or passively (from external factors). Meanwhile, low-concentration cytochalasin D also altered cell shape but did not induce a clear expansion of the cell area (Fig. 2C,D), which might be due to insufficient concentration for complete inhibition of the cortical actin assembly. Golgi complex polarity was sensitively disorganized by an equal concentration of cytochalasin D (Fig. S2H), implying the importance of actin structures for intracellular polarization as a binding platform of diverse polarity proteins (Li and Gundersen, 2008). Moreover, we investigated the pattern of fibronectin (FN), which is a crucial ECM component in cleft

formation (Sakai et al., 2003). In SMG culture, overall FN signaling intensity around epithelial buds and clefts did not change upon blebbistatin treatment (Fig. S3A,B). Although blebbistatin-treated SMGs displayed the relaxed pattern of FN, the concentrated signals in the cleft region were not changed (Fig. S3A). In epiSMG cultures, there was no clear FN pattern around the outer epithelial layers in both groups (Fig. S3C). These data indicate that morphological changes of epithelial buds under actomyosin perturbation is mainly mediated by the alteration of internal stress in epithelial buds.

#### The force transmission mechanism by actomyosin contractility of epithelial layers

How is a highly stressed epithelial sheet involved in patterning an epithelial architecture? To address this question, we first monitored the growth patterns of epithelial buds through time-lapse live imaging. While control epiSMGs showed restricted expansion of



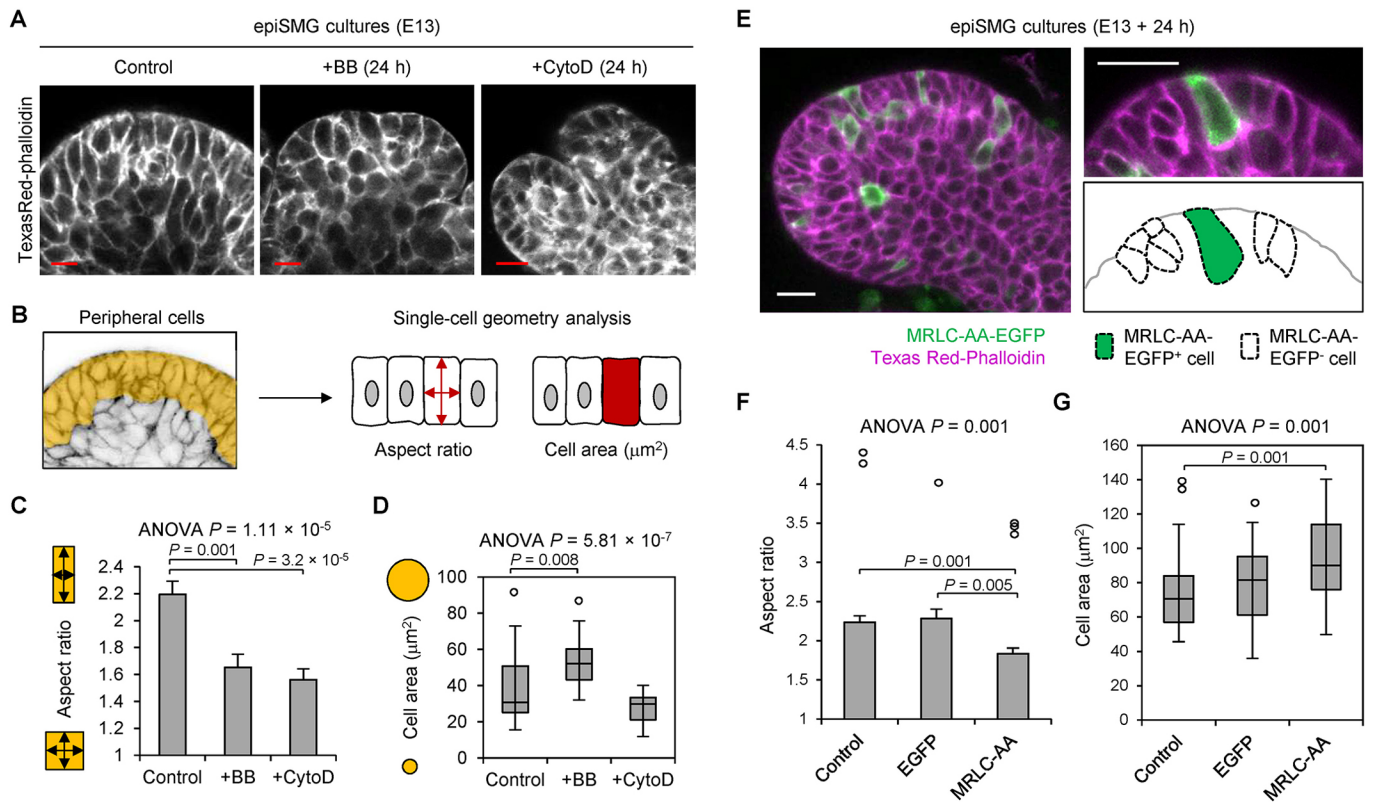

**Fig. 2. Morphological changes in epithelial buds upon perturbation of actomyosin contractility.** (A) F-actin (TexasRed-phalloidin) images of peripheral epithelial layers of epiSMG cultures treated with blebbistatin (BB) and cytochalasin D (CytoD). (B) Schematic representation of the selected regions (yellow) of peripheral epithelial layers used for single-cell geometry analysis. (C) Aspect ratio (major axis/minor axis) of cells in epiSMG cultures treated with blebbistatin and cytochalasin D.  $n=20$  cells per group. Data are mean $\pm$ s.e.m. (D) Cell area in epiSMG cultures treated with blebbistatin and cytochalasin D.  $n=19$  cells (control, +BB), 20 cells (+CytoD). One outlier was excluded in the control and +BB groups. Box plot shows maximum-minimum range (bars), upper and lower quartiles (rectangles), and median value (horizontal line). (E) Left: expression pattern of MRLC-AA-EGFP. Right: simplified pattern comparing the morphology of MRLC-AA-expressing cells (green) and normal cells (white). (F) Aspect ratio of cells in eSMG cultures expressing EGFP or MRLC-AA. Data are mean $\pm$ s.e.m.  $n=34$  cells per group. Two (control), one (EGFP) and three (MRLC-AA) outliers were excluded. (G) Cell area in eSMG cultures expressing EGFP or MRLC-AA. Box plot shows maximum-minimum range (bars), upper and lower quartiles (rectangles), and median value (horizontal line). ( $n=34$  cells per group). Two (control) and one (EGFP) outliers were excluded. Scale bars: 20  $\mu\text{m}$ .

epithelial buds, rapid outgrowth was observed in blebbistatin-treated epiSMGs [outgrowth velocity: 8.33  $\mu\text{m}/\text{h}$  (control) versus 25.13  $\mu\text{m}/\text{h}$  (blebbistatin)] (Fig. 3A,B; Movies 1 and 2). The peripheral epithelial margin of the latter group was radially expanded without directional tendency, resulting in the bleb-like irregular shape (Fig. 3A,B; Movie 2). The irregular outgrowth pattern was more apparent in a salisphere culture model using an SMG acinar cell line (SMG-C6) [Fig. S4A-D; circularity: 0.82 $\pm$ 0.01 (control) versus 0.44 $\pm$ 0.02 (blebbistatin)]. Cell division profoundly affects the organization and size control of epithelial tissues (Gibson et al., 2006), but we observed no significant difference in proliferation rate between the groups (Fig. S4E,F). Based on these results, we found that actomyosin contractility in peripheral layers plays a key role in the restriction of outward growth; furthermore, we hypothesized that the stress generated by increased cell density might be resolved by transmitting the force to another direction. To confirm this conjecture, the spatial force distribution around the surface of epithelial buds was measured via a three-dimensional (3D) force distribution analysis using fluorescent microbeads (Fig. 3C). We quantitatively mapped the time-lapse 3D displacement field in the vicinity of the epithelial layer for 8 h (Fig. 3D-F; see Materials and Methods). First, we tracked the individual microbeads throughout the whole experimental duration.

Interestingly, lateral flow of the microbeads alongside the epithelial layer was detected in a bidirectional manner, and turbulence-like flow was generated towards the inside of the epithelial bud at the point with converging displacement vectors (Fig. 3D; Movie 3). The points of concentrated inward forces were perfectly matched to cleft-propagating positions (Fig. 3D and Fig. S4G). In contrast, blebbistatin-treated epiSMGs showed an even force distribution around the epithelial layer (Fig. 3D; Movie 4). Next, we quantified the full spatiotemporal dynamics of the displacement fields in 3D (see Materials and Methods). Visualizing the 3D distribution of the tangential traction revealed a highly organized and segregated spatial pattern (Fig. 3E). Strikingly, the temporal dynamics of this force distribution predicted cleft formation. After a pair of local and transient tractions are applied inwards, a gradual and prolonged surface retraction is induced, eventually forming a cleft (Fig. 3E). Meanwhile, blebbistatin treatment completely abolished the spatiotemporal organization of the force distribution and resulted in diminished cleft formation (Fig. 3F). Decomposing the measured displacement vectors identified converging tangential traction alongside the epithelial layer at the cleft locations (Fig. 3G). The tracking patterns demonstrated that actomyosin complexes efficiently transmit the internal stress in the epithelial buds to tangential forces, and continuous cell proliferation acts as a major



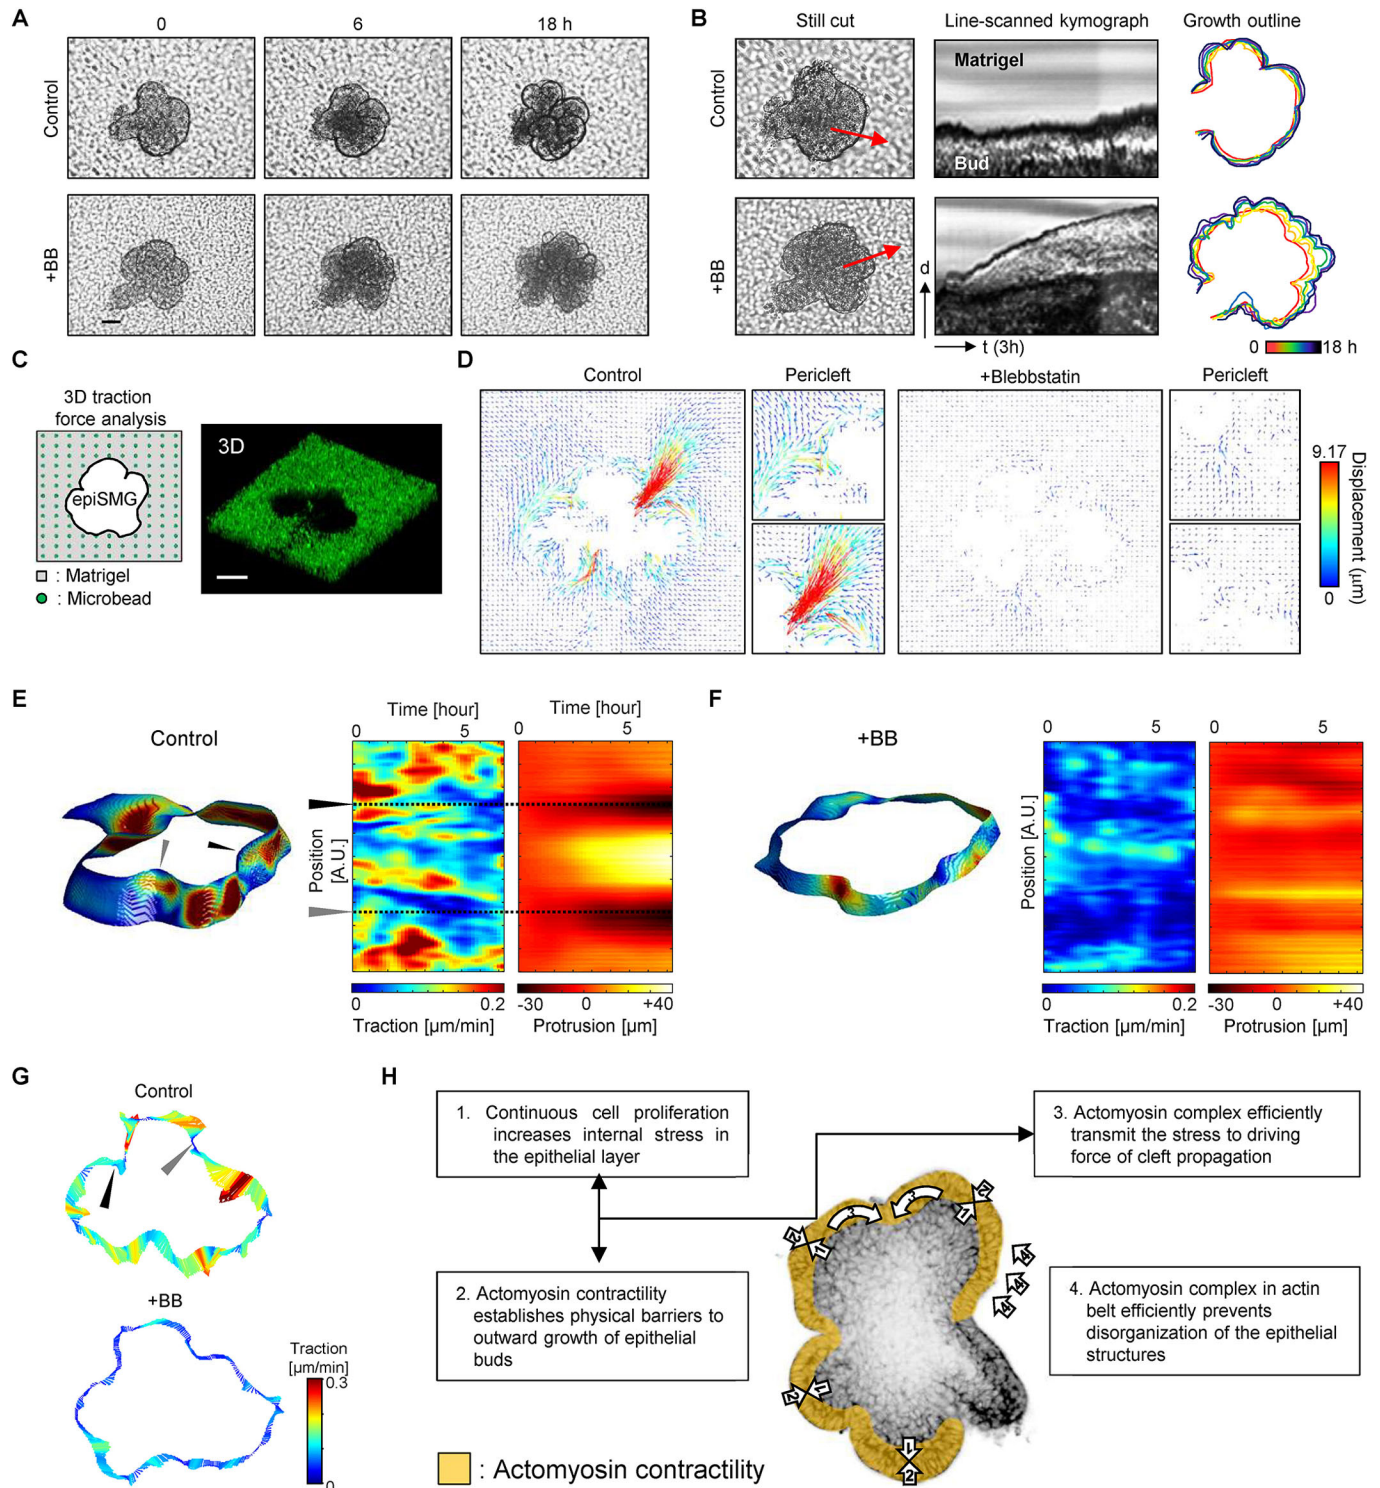

**Fig. 3. Morphological analyses of SMG cultures upon perturbation of actomyosin contractility.** (A) Time-lapse phase-contrast images of developing epiSMG cultures (E13) without (control) or with blebbistatin treatment (+BB). (B) Left: still images of developing epiSMG cultures analyzed for kymographs (red arrows). Middle: line-scanned kymographs of the epithelial margin of epiSMG cultures. Right: outline tracking data of developing epiSMG cultures. (C) Left: experimental scheme for 3D force distribution analysis. Right: volume-rendered image of epiSMG culture in Matrigel containing fluorescent microbeads (pseudocolored). (D) Trajectory maps of bead displacement around developing epiSMG culture (E13+8 h). Right subpanels show enlarged pericleft regions. (E) Left: 3D distribution of tangential traction on epiSMG surface (after 2.5 h). Middle: temporal dynamics of tangential traction at each location along the boundary at a representative intermediate depth. The black and gray arrowheads (and also the dashed horizontal lines) indicate the sites of cleft formation. Right: protrusion/retraction dynamics at the corresponding locations. The traction vectors represent the spatiotemporal flow of the beads rather than the absolute forces (see Materials and Methods). (F) As in E, with blebbistatin treatment. (G) Distribution of displacement vectors on the epiSMG surface without (control) or with blebbistatin treatment (+BB). Time and depth are as in E and F, respectively. Converging tangential components of traction are present at the cleft locations (arrowheads). (H) Schematic representation of the force transmission mechanism by actomyosin contractility of peripheral epithelial layers. Scale bars: 50  $\mu\text{m}$ .

driving force of cleft propagation (Fig. 3H). This effect could provide compelling evidence for a buckling-infolding model of cleft formation (Kim et al., 2018).

### Actomyosin contractility regulates acinar-ductal differentiation of SMG cultures

Cleft formation and propagation are crucial events for the compartmentalization of the functional units of salivary glands,

i.e. the acinus and duct (Harunaga et al., 2011). Together with the halted cleft propagation, we found that salivary glands (SMGs and sublingual glands) treated with blebbistatin presented an immature and undistinguishable ductal structure (Fig. 4A). Notably, tubulogenesis was blocked by blebbistatin treatment, as illustrated by impaired midline condensation of zonula occludens-1 (ZO-1), the key step of ductal lumen formation (Nedvetsky et al., 2014) (Fig. 4A). Compared with the control group, blebbistatin-treated

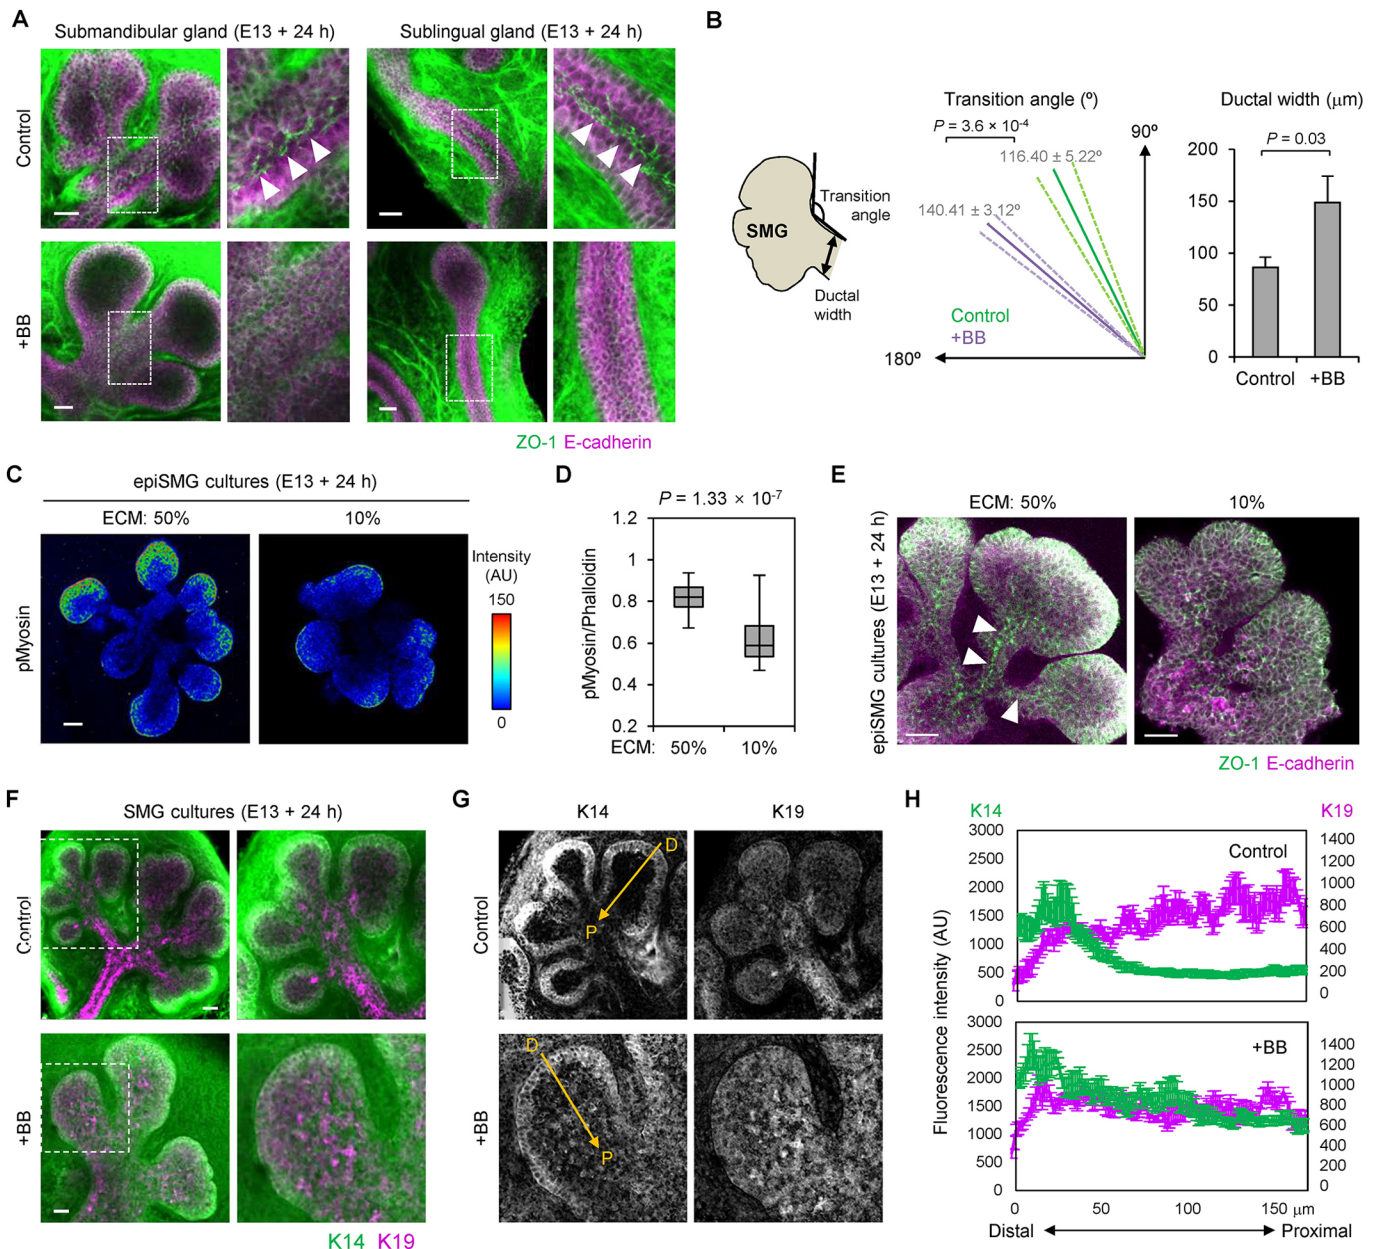

**Fig. 4. Changes in acinar-ductal patterns upon perturbation of actomyosin contractility.** (A) Immunolabeled images of zonula occludens-1 (ZO-1, green) and E-cadherin (magenta) in E13 SMG (left) and sublingual gland (right) cultures. The white dashed region indicates the area enlarged on the right. Arrowheads indicate the condensed ZO-1 patterns. (B) Quantified transition angle [ $n=18$  (control),  $n=20$  (+BB)] and ductal width [ $n=8$  (control),  $n=10$  (+BB)] of SMG cultures. Data are mean  $\pm$  s.e.m. (C) Pseudocolor images of phosphorylated myosin (pMyosin) signals in E13 epiSMGs cultured in high (50%) and low (10%) concentrations of Matrigel for 24 h. (D) Relative value of pMyosin to F-actin signals in high ( $n=28$  buds) and low ( $n=25$  buds) concentrations of Matrigel. Box plot shows maximum-minimum range (bars), upper and lower quartiles (rectangles), and median value (horizontal line). (E) Immunolabeled images of zonula occludens-1 (ZO-1, green) and E-cadherin (magenta) in E13 epiSMGs cultured in high- and low-concentration Matrigel for 24 h. Arrowheads indicate the condensed ZO-1 patterns. (F) Immunolabeled images of K14 (green) and K19 (magenta) patterns in control and blebbistatin-treated SMG cultures. White dashed regions indicate the areas enlarged on the right. (G) The regions used for the intensity plot (yellow arrows) to quantify the spatial profiles of K14 and K19 signals. D, distal; P, proximal. (H) Intensity plot of K14 (green) and K19 (magenta) signals across epithelial buds in G. Data are mean  $\pm$  s.e.m.  $n=9$ . Scale bars: 50  $\mu\text{m}$ .



SMG cultures featured a more obtuse transition angle between the acinar and ductal borders [ $116.40 \pm 5.22^\circ$  (control) versus  $140.41 \pm 3.12^\circ$  (blebbistatin)] with a wider ductal diameter [ $86.35 \pm 9.86 \mu\text{m}$  (control) versus  $148.76 \pm 25.46 \mu\text{m}$  (blebbistatin)] (Fig. 4B). We applied an additional model, in which actomyosin contractility is modulated by adjusting ECM concentration around epiSMG cultures (Paszek et al., 2005) (see Materials and Methods). Low-concentration matrix reduced myosin phosphorylation levels (Fig. 4C,D) and elicited immature morphogenesis, undefined cleft formation and impaired ductal structures (Fig. 4E), similar to blebbistatin-treated SMG cultures (Fig. 4A). We verified the differentiation state of SMG cultures by investigating the pattern changes of proximal ( $\text{K19}^+$ )/distal ( $\text{K14}^+$ ) progenitor cells upon actomyosin perturbation. Strikingly, blebbistatin-treated epithelial buds showed less condensed patterns of  $\text{K14}^+$  progenitor cells in the distal region of the acinus (Fig. 4F-H). Moreover,  $\text{K19}^+$  progenitor cells showed diffused patterns from proximal to distal region, resulting in a mixed population of  $\text{K14}^+$  and  $\text{K19}^+$  cells (Fig. 4F-H).

### Whole-transcriptome analysis reveals the crucial factor in acinar-ductal differentiation

Different modes of force (e.g. compressive, tensile and shear) have been known to elicit transcriptional changes in diverse genes, especially in cell types exposed to dynamic stress fields (Diamond et al., 1990; Hatton et al., 2003; Rysa et al., 2018). Although there is

a possibility that blebbistatin treatment physically perturbed the ductal formation, we hypothesized that actomyosin contractility plays a significant role in the regulation of genetic programs for acinus-duct differentiation of salivary glands. Therefore, we profiled transcriptional changes of epiSMGs upon actomyosin perturbation (blebbistatin treatment) by conducting a whole-transcriptome analysis via RNA-sequencing (RNA-seq) (Fig. 5A). RNA-seq revealed that blebbistatin treatment significantly altered the expression of 150 genes (greater than 1.5-fold change,  $P < 0.05$ ), including 53 up- and 97 downregulated genes. Among the 150 differentially expressed genes (DEGs), multiple transcripts were related to developmental processes (Tgfb1, Tgfb3, Wnt4 and Wnt7b) (Cadigan and Nusse, 1997; Nishita et al., 2000) and ECM-cell interaction (Col2a1, Col9a2 and Itgb3) (Table S1). Gene ontology (GO) analysis of biological processes showed a number of annotations containing the categories of morphogenesis, differentiation and development with high significance ( $P < 0.001$ ) (Fig. S5A). The GO analysis and DEG results support the fact that diverse genes were dynamically regulated upon perturbation of actomyosin function. Interestingly, volume plots of the expression values revealed a striking decrease in *Kit* expression (Fig. 5B), which is a crucial mediator of epithelial stem cell differentiation and morphogenesis (Leong et al., 2008). *Kit* was also listed in the multiple gene set of highly enriched GO annotations (e.g. anatomical structure morphogenesis) and in the phosphoinositide

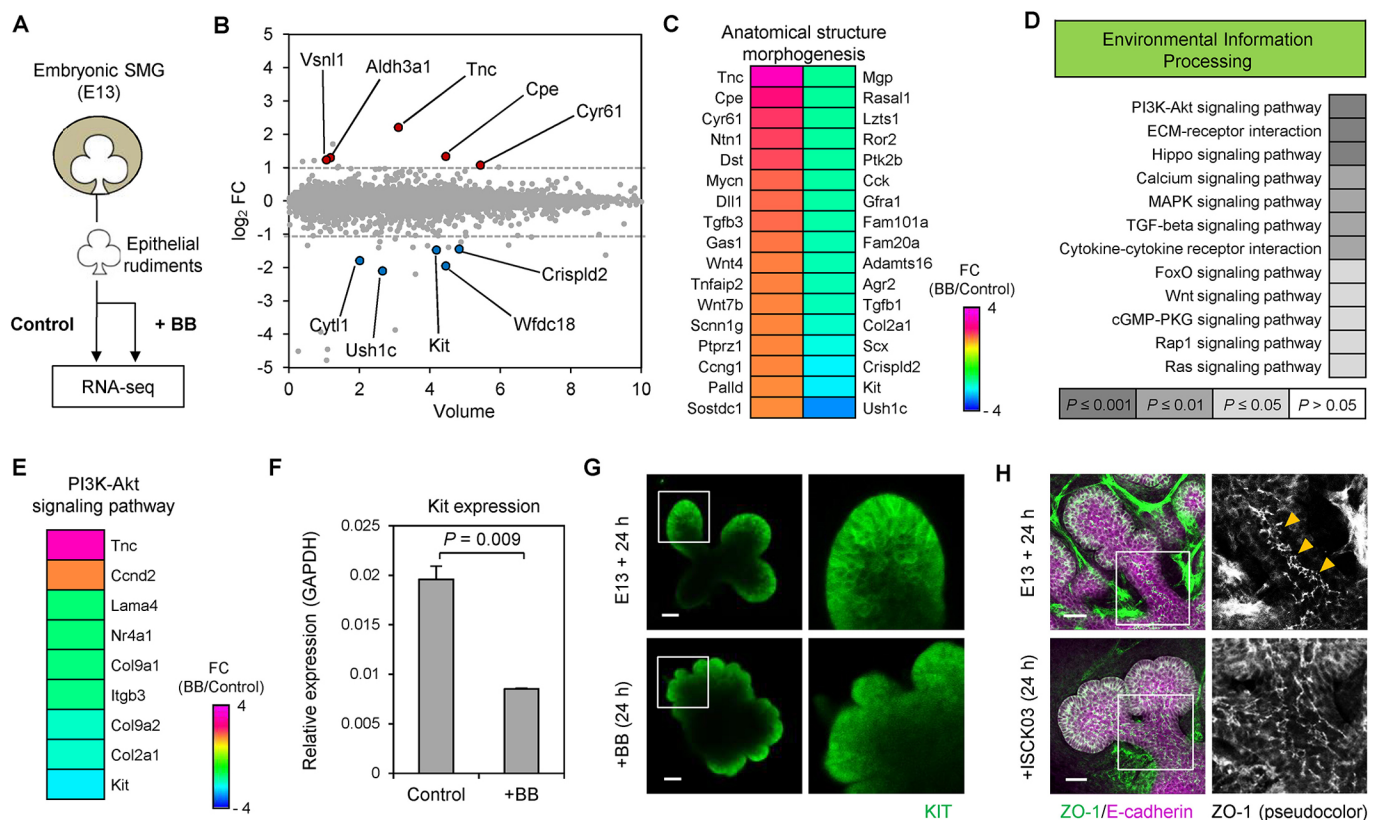

**Fig. 5. Whole-transcriptome analysis of SMG cultures upon perturbation of actomyosin contractility.** (A) Experimental scheme for whole-transcriptome analysis through RNA-sequencing (RNA-seq). (B) Volume plot of the expression values. The top five genes are color-coded as red (increased) and blue (decreased). (C) Heatmap showing representative differentially expressed genes (DEGs) in anatomical structure morphogenesis annotation. DEGs are arranged by descending fold-change (FC). (D) KEGG enrichment map score (based on  $P$  value). (E) Heatmap showing representative DEGs categorized in the PI3K-Akt signaling pathway. DEGs are arranged by descending FC. (F) Quantitative real-time polymerase chain reaction (qPCR) results of *Kit* expression in epiSMG cultures. Data are mean  $\pm$  s.e.m.  $n=3$ . (G) Immunolabeled images of KIT expression in epiSMG cultures (E13) treated with blebbistatin (24 h). White outlined regions indicate the areas enlarged on the right. (H) Immunolabeled images of ZO-1 (green) and E-cadherin (magenta) expression in epiSMG cultures (E13) treated with ISCK03 (a KIT inhibitor). White outlined regions indicate the areas enlarged on the right. Scale bars: 50  $\mu\text{m}$ .



3-kinase pathway in the KEGG database (Fig. 5C-E, Fig. S6). The decreased *Kit* levels induced by blebbistatin were confirmed by quantitative PCR (Fig. 5F), and decreased signal with disrupted localization of KIT protein was also observed via immunostaining (Fig. 5G). Surprisingly, different epithelial organ cultures in the initial morphogenic stage (SMG, E14; lung, E12; kidney, E13; pancreas, E13) commonly showed a clear decrease in KIT expression upon blebbistatin treatment [SMG,  $-36.6\%$ ; lung,  $-14.3\%$ ; kidney,  $-16.4\%$ ; pancreas,  $-29.3\%$ ,  $P < 0.005$ ] (Fig. S7), implying the general involvement of actomyosin contractility in KIT expression in diverse organs.

During SMG development, KIT is known to transmit signals for the expansion of distal progenitor cells ( $K14^+$ ) in epithelial buds, which is crucial for determining cell fate for acinus and duct formation (Lombaert et al., 2013). The mixed pattern of  $K14^+/K19^+$  progenitor cells produced by blebbistatin treatment that we observed (Fig. 4F) was highly similar to the pattern of epithelial buds seen in response to inhibition of KIT activity and in KIT knockout models that have been previously reported (Lombaert et al., 2013). In addition to these results, we performed structural evaluation of developing ducts under the condition of KIT inhibition by investigating ZO-1 midline patterns. As expected, ISCK03 (a KIT inhibitor) treatment elicited the diffused patterns of ZO-1 without midline condensation at the site of ductal formation (Fig. 5H), which is analogous to the case of blebbistatin treatment (Fig. 4A). These data indicate that actomyosin is required for a normal level of KIT expression through transcriptional regulation, and that this cascade can be a major reason for immature acinus and duct formation of SMGs.

#### YAP- and TAZ-mediated genetic changes in SMG cultures

Next, we dissected the signaling mechanism underlying this genetic event induced by mechanical perturbation. We identified *Cyr61*, a representative target gene of the YAP/TAZ-TEAD complex, among the top five upregulated genes [*Tnc*, *Cpe*, *Aldh3a1*, *Nsn11* and *Cyr61* (*Ccn1*) in descending order; Fig. 5B]. We then verified the localization pattern of YAP proteins and confirmed the increased nuclear localization of YAP in SMG epithelial cells after blebbistatin treatment [nucleus/cytoplasm=0.84 (control) versus 1.45 (+blebbistatin),  $P=4.72 \times 10^{-11}$ ] (Fig. 6A,B). The same pattern of YAP translocation was also observed in lung and kidney cultures (Fig. S8A-C). Moreover, inhibition of ROCK activity induced the nuclear translocation of YAP (Fig. S8D,E). The localization pattern of YAP sensitively responded to the alteration in ECM stiffness (Fig. 6C,D). The epithelial buds in low-stiffness Matrigel had a high proportion of nuclear YAP proteins, confirming the results from the blebbistatin treatment. Transcriptional activity of YAP was verified by the increased expression of the YAP and TAZ target genes *Cyr61* and *Ctgf* (*Ccn2*; Fig. 6E). The enhanced YAP and TAZ activity was not wired to conventional Hippo signaling, as demonstrated by the absence of detectable changes in large tumor suppressor kinase (LATS) and YAP phosphorylation upon blebbistatin treatment (Fig. 6F,G). To validate the regulatory role of YAP and TAZ in KIT expression, we suppressed YAP and TAZ activity by knocking down both genes in epiSMG cultures (Fig. S9A,B) and detected increased *Kit* expression (Fig. 6H). In addition, verteporfin (an inhibitor of the YAP/TAZ-TEAD interaction) treatment completely rescued the suppression of *Kit* expression by blebbistatin treatment (Fig. 6I). *K14* expression levels followed the trend of *Kit* expression (Fig. 6I). Collectively, these results confirmed the following scenario: actomyosin perturbation by blebbistatin induces YAP and TAZ translocation, and the activated complex negatively regulates KIT expression.

#### DISCUSSION

Throughout this work, we reported the mechanical and genetic effects of actomyosin contractility in the initial phase of branching morphogenesis through optical, genetic and biochemical assays (Fig. 6J). We identified the different actin patterns that characterize various developing epithelial organs and dissected the mechanical role of actomyosin contraction in driving cleft formation by using epithelial cultures of salivary glands. We introduced a buckling mechanism, a key physical process in complex morphology of diverse organs (Nelson, 2016), in the context of salivary gland branching morphogenesis. The core mechanism is actomyosin contractility of the outer epithelial cells efficiently transmitting the forces from mechanical instability to an inward buckling force (Fig. 3H). When the actomyosin contractility was perturbed, striking morphological irregularity of epithelial buds was observed (Fig. 1C,E). Based on our observational data and background knowledge, we can anticipate the underlying processes in the morphological distortion of epithelial buds. First, decreased actomyosin contractility allows epithelial outgrowth with disrupted integrity of epithelial layers. Moreover, perturbed contractility decreases epithelial tension, then lateral compressive stress, the triggering factor of the buckling mechanism, potentially passively increasing in epithelial layers. In addition to compressive stress, decreased stiffness of epithelial cells by blebbistatin treatment can alter buckling patterns more sporadically and transiently (Martens and Radmacher, 2008; Nelson, 2016). We speculate that the aforementioned processes collectively elicit the morphological changes of epithelial buds.

Genetically, the physical balance in the epithelial buds intricately sustains KIT expression, a critical mediator of progenitor cell differentiation for acinus/duct formation, by regulating YAP and TAZ transcriptional activity. In branching morphogenesis, the role of YAP and TAZ activity has been recently highlighted in lung and kidney culture models (Lin et al., 2017; Reginensi et al., 2016). Notably, a recent article reported the role of YAP in ductal progenitor patterning in mouse SMGs (Szymaniak et al., 2017). The article provided RNA-seq results evaluating differences in the expression profiles between wild-type and YAP-conditional knockout (*Yap-cnull*) mice. This study reported an inverse relationship between YAP and KIT expression, which is consistent with our results. However, they detected a decrease in *K14* expression in SMGs of *Yap-cnull* mice, which is different from our result. The authors demonstrated that the Hippo pathway is a key upstream signal of YAP-mediated epiregulin expression, and the paracrine effect of epiregulin regulates *K14* expression through EGFR signaling pathway. In this study, we suggest a different mechanism underlying *K14* regulation mediated by the YAP-KIT signaling cascade. In terms of the regulatory mechanism of YAP activity, a previous study suggested the canonical Hippo pathway, while our investigation suggested the Hippo pathway-independent mechanotransduction process as an upstream signal. Based on the background, we anticipate that a differential upstream signaling input has a multimodal effect on YAP activity that causes differences in *K14* expression.

The concept of YAP and TAZ-mediated mechanotransduction has largely contributed to provide a plausible explanation for various biological events regulated by physical factors. Previous reports were generally based on 2-dimensional *in vitro* culture systems, and have found that well-defined actin stress fibers engaged to adhesion clutches are a key factor for mechanosensing and YAP and TAZ transcriptional activity. Through the experimental models, diverse regulators involved in the mechanotransduction process have been

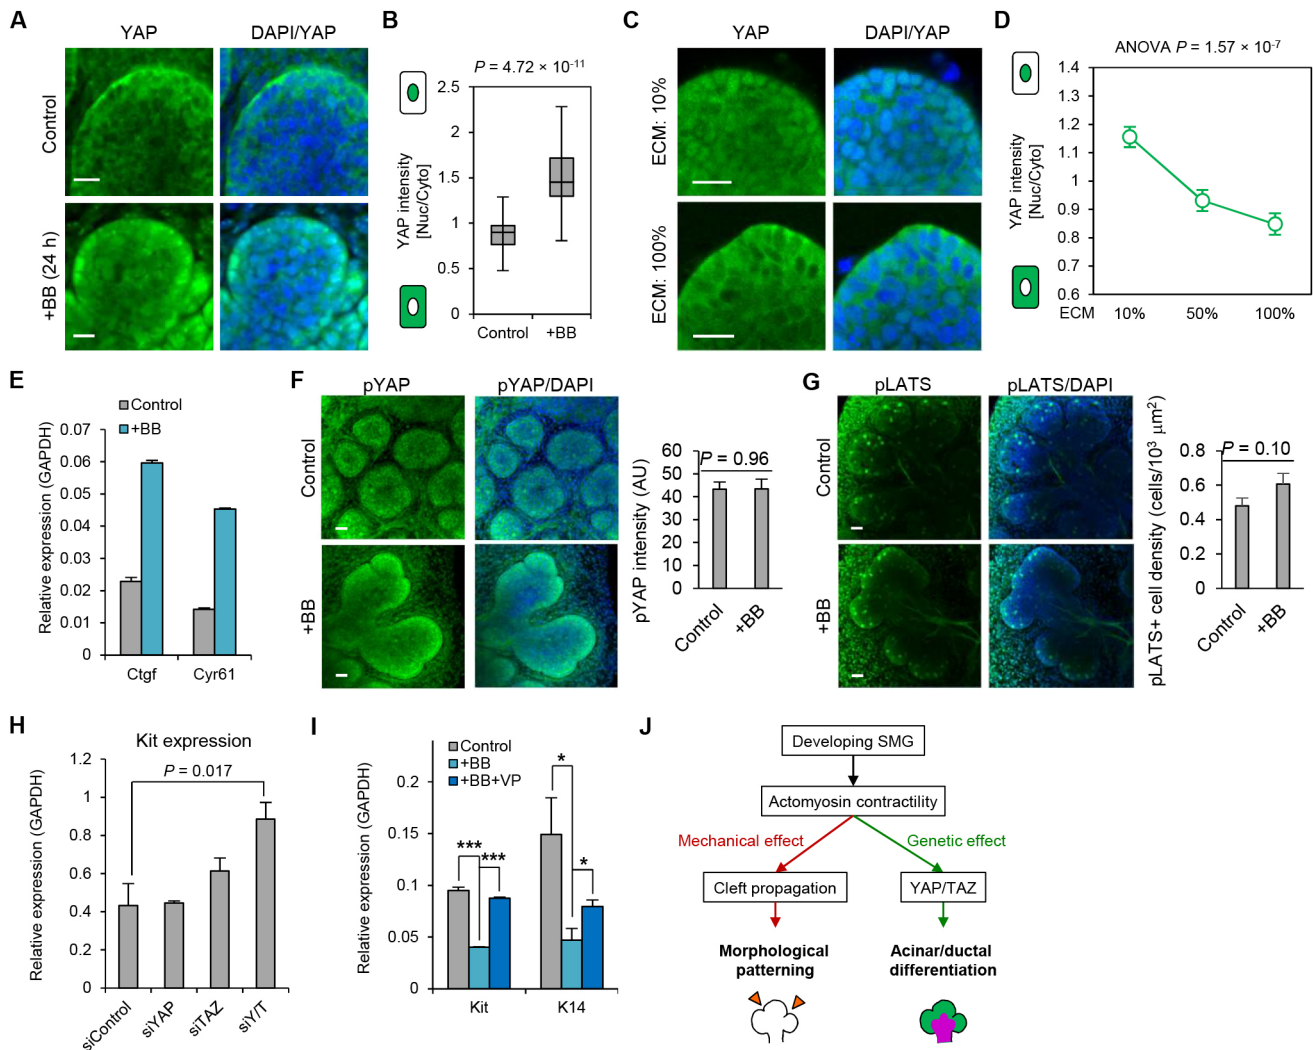

**Fig. 6. YAP/TAZ-mediated genetic changes in SMG cultures.** (A) Immunolabeled images of YAP (green) patterns and DAPI (blue) signals in control and blebbistatin (+BB)-treated E13 SMG cultures (24 h). (B) Relative intensity of nuclear and cytoplasmic YAP signals in control ( $n=30$  cells) and blebbistatin ( $n=30$  cells)-treated SMG cultures. Box plot shows maximum-minimum range (bars), upper and lower quartiles (rectangles), and median value (horizontal line). (C) Immunolabeled images of YAP (green) patterns and DAPI (blue) signals in E13 epiSMGs cultured in high (100%) and low (10%) concentration Matrigel for 24 h. (D) Relative intensity of nuclear and cytoplasmic YAP signals in epiSMGs cultured in Matrigel of diverse concentration. Data are mean $\pm$ s.e.m.  $n=30$  cells per group. (E) qPCR results of the changes in YAP and TAZ downstream genes in epiSMG cultures upon blebbistatin treatment. Data are mean $\pm$ s.e.m.  $n=3$ . (F,G) Immunolabeled images (left) and quantified results (right) of phosphorylated YAP (F) and LATS (G) in SMG cultures (E13+24 h) in the control and blebbistatin-treated (+BB) groups. Data are mean $\pm$ s.e.m. (H) Nested qPCR results of the changes in *Kit* expression in epiSMG cultures transfected with siYAP and siTAZ. Data are mean $\pm$ s.e.m.  $n=3$ . (I) Nested qPCR results of the changes in *Kit* and *K14* expression in control, blebbistatin alone, and blebbistatin and verteporfin (VP) groups of epiSMG cultures. Data are mean $\pm$ s.e.m.  $n=3$ . \* $P<0.05$ , \*\*\* $P<0.005$ . (J) Schematic representation of mechanogenetic role of actomyosin contractility in branching morphogenesis. Scale bars: 50  $\mu$ m.

introduced: YAP and TAZ activity was enhanced when cells were on a stiff substrate and suppressed on soft conditions or upon actomyosin perturbation (Case and Waterman, 2015; Dupont et al., 2011). The mechanical checkpoint modulated by ECM-stress fibers is known to be regulated by F-actin capping and severing proteins (e.g. CapZ and cofilin 1) and by focal adhesion complexes, including adhesion kinases (Aragona et al., 2013; Elosegui-Artola et al., 2016). Moreover, geometric factors, including adhesion area and cell shape, also affect the mechanogenetic processes (Dupont et al., 2011).

However, the experimental model in this study presents a distinct biological context in which developing epithelial clusters interact with ECM (or mesenchymal tissues) in a 3D manner. At a subcellular level, the cells presented the following morphological characteristics: first, F-actin structures consisting of a circumferential cortex-dominant actin pattern; and, second,

well-established intercellular adhesions and a highly polarized morphology with low ECM adhesion area (Fig. 2A). According to these differences, YAP and TAZ also showed a unique response to physical changes (Fig. 6A-D), indicating that this system employs a distinct operating mechanism distant from previously reported mechanotransduction modules. Notably, recent work also introduced different modes of YAP and TAZ regulation in the epithelial monolayer (Furukawa et al., 2017; Totaro et al., 2018). The authors reported highly organized cortical actin (circumferential actin belt) in cells cultured at high densities, and a low basal activity of YAP and TAZ. In addition, blebbistatin treatment of the monolayer induced YAP and TAZ nuclear translocation, which is consistent with our results. These results support our findings, and the authors suggest that the structure of actin patterning is a crucial determining factor of this phenomenon.

Taken together, we can conclude that YAP and TAZ are differentially regulated, depending on their biological context.

The reciprocal interaction of epithelial cells and ECM is a key event to sculpture the organ morphologies (Dzamba and DeSimone, 2018). In salivary glands, ECM remodeling and related proteins have been extensively studied for cleft formation (Harunaga et al., 2011). Among ECM components, fibronectin has been proposed as a key inducer of cleft formation (Sakai et al., 2003). Fibronectin was concentrated on cleft-forming sites, and regulates the expression of *Btbd7* to reduce E-cadherin integrity that is an essential event for cleft formation (Onodera et al., 2010). Fibronectin as well as other ECM proteins also act as a binding partner of integrin families, leading to outside-in signals in epithelial cells. This signaling event is essential to establish the cortical actin patterns of epithelial layers, which is a core structural mediator of our findings. This evidence suggests the necessity of in-depth study of the interplay between epithelial cells and ECM proteins in future research. It will enable researchers to address one of the fundamental questions in the branching processes of epithelial organs: how are clefts localized, initiated and propagated at specific sites?

Including this work, various models and hypotheses explaining mechanosensing and transduction process are now being introduced in broad fields of biology (Ray et al., 2013). The mechanical aspects of diverse biological processes are beginning to be understood, although a number of questions remain, especially regarding the underlying molecular mechanisms. Recently introduced mechanistic studies greatly help to unravel the mechanisms underlying mechanical processes (Furukawa et al., 2017; Meng et al., 2018). We expect that our model of branching morphogenesis will also contribute to elucidating previously unknown aspects of mechanobiology.

## MATERIALS AND METHODS

### Reagents and plasmids

The chemical reagents and plasmids used in this study are as follows: 50  $\mu$ M blebbistatin (Sigma-Aldrich, B0560), 100 nM cytochalasin D (Sigma-Aldrich, C8273), 10  $\mu$ M verteporfin (Sigma-Aldrich, SML0534), 50  $\mu$ M Y27632 (Sigma-Aldrich, I2764), Texas Red-X Phalloidin (Thermo Fisher Scientific, T7471), 10  $\mu$ M ISCK03 (Sigma-Aldrich, I6410) and DiD (Thermo Fisher Scientific, D7757). pEGFP-MRLC T18A, S19A was a gift from Tom Egelhoff (Beach et al., 2011) (Addgene plasmid 35681). AAV-CAG-GFP was a gift from Karel Svoboda (Mao et al., 2011) (Addgene plasmid 28014). pHelper (340202) and pAAV-RC2 plasmids (VPK-422) were purchased from Cell Biolabs. AAV-CAG-MRLC T18A/S19A was cloned by inserting the MRLC PCR amplicon into the AAV-CAG-GFP vector with flanking BamHI/AgeI restriction sites.

### Mouse embryonic organ culture

ICR strain mice were used for embryonic epithelial organ culture. Animal studies were approved by the CHA University Institutional Animal Care and Use Committee (approval number IACUC180069). All experiments were conducted according to the relevant guidelines and regulations. Submandibular glands (SMGs) were explanted from E13 embryos under a stereo light microscope (Leica, KL300 LED). The explanted organs were plated on 0.1  $\mu$ m pore-size polycarbonate membranes (Whatman, 110405) and cultured in 50 mm microwell dishes (MatTek Corporation, P50G-1.5-14-F) in Dulbecco's modified Eagle's medium/nutrient mixture F-12 (DMEM/F-12, Gibco, 21041-025) containing 100 U penicillin-streptomycin (Gibco, 15140122), 150  $\mu$ g/ml ascorbic acid (Sigma-Aldrich, A5960) and 50  $\mu$ g/ml transferrin (Sigma-Aldrich, T8158). Epithelial rudiment culture was conducted based on previous methods (Rebustini and Hoffman, 2009). Briefly, explanted SMGs were immersed in dispase I (0.5 U/ml; Life Technologies, 17105-041) for 20 min and washed with DMEM/F12 containing 5% bovine serum albumin (Sigma-Aldrich, A7906). The mesenchymal regions of SMGs were then dissected under a stereo microscope, and the isolated epithelial rudiments were embedded in

growth factor-reduced Matrigel (Corning, 356231) diluted with DMEM/F12 culture media supplemented with 100 ng/ml Fgf7 (R&D Systems, 251-KG) and 10 ng/ml EGF (R&D Systems, 236-EG) at a 1:1 ratio. A polycarbonate membrane was placed on the gel matrix, and MEM/F12 culture medium was added at 15 min intervals for complete gelation. To modulate the elasticity of Matrigel (Figs 4C and 6D), we decreased the Matrigel concentration from 100% to 10% by increasing the amount of culture media. Other epithelial organs from mouse embryo were cultured according to previously reported methods (Barak and Boyle, 2011; Del Moral and Warburton, 2010; Gaete et al., 2015; Greggio et al., 2013; Voutilainen et al., 2013).

### Imaging procedures and analyses

SMG cultures extracted from E13 mouse embryos were embedded in paraffin blocks and sliced into 4  $\mu$ m sections. Morphology of organ cultures was captured on an inverted light microscope (Nikon, Ti) equipped with a digital camera (Nikon, DS-Ri2) and a CFI Plan Fluor 4 $\times$  objective (Nikon). Time-lapse images of morphological changes were monitored using JuLI Br live-cell movie analyzer (NanoEnTek). Optical sectioning images were acquired on a confocal laser scanning microscope (Carl Zeiss, LSM700) equipped with Plan-Apochromat 10 $\times$ , Plan-Apochromat 20 $\times$  and C-Apochromat 40 $\times$  objectives (Carl Zeiss), and with 405, 488, 555 and 647 nm excitation lasers. All images of developing buds at the single-cell level were taken by optically sectioning images of the midplane of each bud, showing maximum bud diameter (Fig. S2A). Images were analyzed using Fiji software (Schindelin et al., 2012). Signal intensity, angle and geometric parameters (bud number, organ area, aspect ratio and circularity) were analyzed using the measure and ROI manager plug-ins based on phase contrast and fluorescence images. F-actin signals were quantified by manual detection of cortical actin in a single-cell region (Fig. S1A). Line scan analyses were performed using the Multi Kymograph plugin for quantifying the patterns of pMyosin/F-actin (Fig. S1F) and K14/K19 (Fig. 4H). Nucleus- or membrane-located fluorescent signals were automatically detected using a wand tracing tool (supported by Fiji software) based on the organelle marker signals (DAPI and Did). Cleft depth was measured as the distance between the contact point of two inner bud surfaces and the tangential line of the bud outer surface based on phase contrast images (Fig. 1D, upper panel). For measuring KIT signal intensities (Fig. S7), the regions of each single bud were manually selected and analyzed by ROI manager plug-ins (Fiji software).

### Real-time PCR

Total RNA was extracted from SMG cultures using the RNeasy Mini Kit (Qiagen, 74140). Total RNA (1  $\mu$ g) was applied for complementary DNA (cDNA) synthesis using the SuperScript III First-Strand Synthesis System (Thermo Fisher Scientific, 18080) with an oligo-dT primer. Real-time PCR was performed using SYBR PCR master mix (Applied Biosystems, 4309155) and a real-time PCR machine (Applied Biosystems, 7200). Nested PCR was performed by following previous protocols (Won et al., 2017). Briefly, the collected SMG cultures were used directly for cDNA synthesis using the Superscript III system. The cDNA was used for two-step PCR procedures with Platinum *Taq* DNA Polymerase (Thermo Fisher Scientific, 10966) and nested primers. The primer sequences were as follows (5' to 3'): Kit-outer-F, CAAAGGAAATGCACGACTGC; Kit-outer-R, TTGACCCTCACGGAATGGTC; Kit-inner-F, GGTCGACTCC-AAGTTCTACAAG; Kit-inner-R, CTTTTC AAGGGGTCAGCGTC; Kit-F, TCCTCTGGGAGCTCTTCTCCTT; Kit-R, GTTGACAACCTGCTTG-AATGTT; Gapdh-outer-F, ACTTGAAGGGTGGAGCCAAA; Gapdh-outer-R, TTCAGCTCTGGGATGACCTT; Gapdh-inner-F, TCCTGCA-CCA-CCAACTGCTT; Gapdh-inner-R, TGGCAGTGATGGCATGGAC; Ankrd1-F, AAACGGACGGCACTCCACCG; Ankrd1-R, CGCTGTGCT-GAGAAGCTTGCTCT; Ctgf-F, GCTTGGCGATTTTAGGTGTC; Ctgf-R, CAGACTGGAGAAGCAGAGCG; Cyr61-F, GCCGTGGGCTGCAT-TCCTCT; Cyr61-R, GCGGTTCGGTGC AAAAGACAGG; Yap-outer-F, TCCTCCTTTGAGATCCCTGA; Yap-outer-R, TGCTCCAGTGTAGGC-AACTG; Yap-inner-F, TTTGCCATGAACCAGAGGAT; Yap-inner-R, T-TCAACCGCAGTCTCTCCTT; Taz-outer-F, ATGAATCACCACCAACCA-AGCA; Taz-outer-R, CAAAGTCCCGAGGTCAACAT; Taz-inner-F,



TCCCCAACAACCTCCAGAAGAC; Taz-inner-R, GAAGGCAGTCCAGG-AAATCA; K14-outer-F, TGGAGACGTCAATGTGGAGA; K14-outer-R, GGATGACTGAGAGCCAGAGG; K14-inner-F, CAAGGATGCTGAG-GAATGGT; K14-inner-R, AGGGATGCTTTCATGCTGAG.

### 3D force distribution analysis

The isolated epithelial rudiments were embedded in a Matrigel-DMEM/F-12 mixture containing 5% carboxylate-modified microspheres (FluoSpheres, 2.0  $\mu\text{m}$  diameter, Invitrogen, F8826). Live imaging was performed on a confocal microscope (Carl Zeiss) with a customized live-cell chamber (Live Cell Instruments). The images were acquired by excitation of 591 nm laser with transmitted light detector (T-PMT). The image analysis software IMARIS was used to track bead movement using SPOT analysis (intensity threshold, 170; size threshold, 5  $\mu\text{m}$ ; distance threshold, 3  $\mu\text{m}$ ). The tracking results were analyzed using custom Microsoft Excel Visual Basic and MATLAB scripts. The full 3D image area was subdivided into  $10 \times 10 \times 10 \mu\text{m}$  voxels; 3D displacement of each microbead per frame was determined by simple Euclidian distance calculation (the square-root of  $(dx^2+dy^2+dz^2)$ , where dx, dy, dz indicate displacement along the x-, y- and z-axis), and the average displacement within a voxel was calculated. For 2D projections, the average 3D displacement and direction were calculated for voxels on the same z-axis.

For spatiotemporal analysis of 3-D traction, a custom MATLAB script was written and used. First the imaged volume was resized into  $2 \times 2 \times 2 \mu\text{m}$  voxel resolution. The surface of the epithelial rudiments was determined by thresholding with frame-wise thresholds determined by Otsu's method with time-smoothed (over four frames) and heavily Gaussian-filtered (kernel standard deviation 20  $\mu\text{m}$ ) volume (Otsu, 1979). The frame-wise 3D optical flow vectors were calculated from the Lucas-Kanade optical flow equation (Bruce and Lucas, 1981), with a neighborhood radius of 6  $\mu\text{m}$ , and then filtered with the same parameters. The flow vectors at the surface were decomposed into tangential and normal components, with respect to the surface of the epithelial rudiments segmented earlier, and the tangential components were used as the color codes for the surface. The edge protrusion/retraction dynamics at a specific depth was quantified using the previously determined surface boundaries, by applying a marker tracking scheme similar to a previous report (Yang et al., 2016), and then was compared spatiotemporally to the in-plane tangential optical flow dynamics.

### Rat submandibular epithelial cell line (SMG-C6) culture

Prof. Guang-Yan Yu (Peking University, China) kindly shared SMG-C6 cells. The cell line is authenticated and has been tested for contamination. SMG-C6 cells were cultured in 5%  $\text{CO}_2$  at 37°C with DMEM/F12 (Sigma-Aldrich, D8900) containing 2.5% FBS, 5  $\mu\text{g}/\text{ml}$  transferrin, 1.1  $\mu\text{M}$  hydrocortisone, 100 nM retinoic acid, 2 nM T3, 5  $\mu\text{g}/\text{ml}$  insulin, 80 ng/ml EGF, 5 mM glutamine, 50  $\mu\text{g}/\text{ml}$  gentamicin sulfate and 1% penicillin-streptomycin. For salisphere cultures, 10  $\mu\text{l}$  of Matrigel was injected into the microwells of  $\mu$ -Plate Angiogenesis 96-well plate (Ibidi, 89646) and  $1.0 \sim 3.0 \times 10^4$  cells in culture media were plated on the gel after setting.

### Adeno-associated virus production

To produce adeno-associated virus (AAV), human embryonic kidney (HEK)-293 cells were grown to ~70-80% confluence in DMEM (WelGene, LM-001-05) containing 10% fetal bovine serum (WelGene, S001). Transfection of the plasmids containing AAV constructs was conducted using Polyethylenimine (PEI, Polyscience, 23966) at a 1:2.5 DNA:PEI ratio. AAV expression plasmid, pAAV-RC2 and pHelper were transfected at a 1:1:2 ratio. After 48 h, the AAV products were purified using a pAAVpro Purification Kit (Takara, 6232) according to the manufacturer's instructions. Isolated epithelial rudiments were immersed in DMEM/F-12 media containing AAV particles (~1:5-1:50) for 1 h at room temperature, washed three times with DMEM/F-12 and incubated in Matrigel.

### Immunofluorescence

Epithelial cultures were fixed with 4% paraformaldehyde for 20 min at room temperature and washed with phosphate-buffered saline containing 1% Tween-20 (PBST). The cultures were permeabilized with PBS containing

Triton X-100 (PBSX) for 20 min at room temperature and washed again with PBST. Blocking was performed by treatment with PBS containing 0.1% BSA and 10% FBS. After 1 h, the blocking solution was changed to PBS containing primary antibody (1:200) and incubated on a laboratory shaker at 4°C overnight. The cultures were incubated with secondary antibody-PBST solution (1:500) for at least 6 h at room temperature. The following antibodies were used in this study: rabbit polyclonal phospho-myosin light chain 2 (Ser19) (Cell Signaling Technology, 3671), rabbit polyclonal ZO-1 (Thermo Fisher Scientific, 40-2200), mouse monoclonal E cadherin (Abcam, ab76055), mouse monoclonal GM130 (BD Bioscience, 610822), goat polyclonal KIT (Santa Cruz Biotechnology, sc-1494), rabbit polyclonal cytokeratin 14 (BioLegend, 905301), rat monoclonal cytokeratin 19 (Developmental Studies Hybridoma Bank, Troma111), rabbit polyclonal YAP (Cell Signaling Technology, 4912), rabbit monoclonal phospho-YAP (Ser127) (Cell Signaling Technology, 13008), rabbit polyclonal phospho-LATS1 (Ser909) (Cell Signaling Technology, 9157), mouse monoclonal phospho-Histone H3 (Cell Signaling Technology, 9706) and rabbit polyclonal fibronectin antibody (Abcam, ab2413). The following secondary antibodies were used in this study: Alexa Fluor 488 goat anti-mouse IgG (H+L) (Invitrogen, A11001), Alexa Fluor 594 goat anti-mouse IgG (H+L) (Invitrogen, A11005), Alexa Fluor 488 donkey anti-goat IgG (H+L) (Invitrogen, A11055), Alexa Fluor 488 goat anti-rabbit IgG (H+L) (Invitrogen, A11008) and Alexa Fluor 647 donkey anti-rat IgG (H+L) (Abcam, ab150155).

### RNA interference

Submandibular salivary glands (SMGs) epithelial rudiments were immersed in 200  $\mu\text{l}$  of Opti-MEM (Gibco, 31985) containing 5  $\mu\text{l}$  of Oligofectamine Transfection Reagent (Invitrogen, 12252) and 500 nM siRNA products for 4 h at 37°C and 5%  $\text{CO}_2$ . The transfected cultures were embedded in Matrigel plated on glass-bottomed microwell dishes (MatTek Corporation). siYAP, siTAZ and control siRNA were purchased from Dharmacon (ON-TARGETplus siRNA, L-046247-01, L-041057-01 and D-001810-01), and Block-iT Alexa Red fluorescent oligo was purchased from Invitrogen (14750).

### RNA-sequencing

In order to construct cDNA libraries with the TruSeq RNA Sample Prep kit, 1  $\mu\text{g}$  of total RNA was used. The protocol consisted of polyA-selected RNA extraction, RNA fragmentation, random hexamer primed reverse transcription and 100 nucleotide paired-end sequencing by Illumina HiSeq4000. The libraries were quantified using qPCR according to the qPCR Quantification Protocol Guide and qualified using an Agilent Technologies 2100 Bioanalyzer. We processed reads from the sequencer and aligned them to the *Mus musculus* (*mm10*, <http://genome.uscs.edu>) using Tophat v2.0.13 incorporating the Bowtie v2.2.3 algorithm to perform the alignment. Transcript assembly and abundance were estimated using Cufflinks. Cufflinks v2.2.1 was used to assemble aligned reads into transcripts and to estimate their abundance. To correct sequence expression count bias, '-max-bundle-frags 50000000' options were used. The transcript counts in isoform level were calculated, and the relative transcript abundances were measured in FPKM (fragments per kilobase of exon per million fragments mapped) from Cufflinks. Gene level expression values were also calculated from the transcript counts. We performed the statistical analysis to find differentially expressed genes. Genes with one more than zeroed FPKM values in the samples were excluded. To facilitate log2 transformation, 1 was added to each FPKM value of filtered genes. Filtered data were log2 transformed and subjected to quantile normalization. Statistical significance of the differential expression data was determined using an independent unpaired two-tailed *t*-test and fold change in which the null hypothesis was that no difference exists among groups. False discovery rate (FDR) was controlled by adjusting *P* using the Benjamini-Hochberg algorithm. For the DEG set, hierarchical clustering analysis also was performed using complete linkage and Euclidean distance as a measure of similarity to display the expression patterns of differentially expressed transcripts that are satisfied with fold change  $\geq 1.5$  and an independent unpaired two-tailed *t*-test raw value of  $P < 0.05$ . Gene-enrichment and functional annotation analysis of the significant gene list was performed using Gene Ontology ([www.geneontology.org/](http://www.geneontology.org/)).

## Statistical analysis

All experiments were performed at least three times for independent tests. Differences between two groups were determined using unpaired two-tailed *t*-tests. Multiple groups were compared using one-way ANOVA, followed by post-hoc analysis via an unpaired two-tailed *t*-test with Bonferroni correction. Statistical outliers were excluded using a 2×s.d. cut-off. The Analysis ToolPak-Visual Basic for Application (VBA) supported in Excel was used for all statistical analyses.

## Acknowledgements

We gratefully thank Dr Nury Kim (Institute of Basic Science) for helping to analyze and visualize the trajectories from 3D force distribution analysis.

## Competing interests

The authors declare no competing or financial interests.

## Author contributions

Conceptualization: J.M.K., K.P.; Methodology: J.M.K., Y.J., J.W.J.; Software: Y.J.; Validation: J.M.K., Y.J., J.W.J.; Formal analysis: J.M.K., Y.J., J.W.J.; Investigation: J.M.K., Y.J., J.W.J.; Resources: K.P.; Writing - original draft: J.M.K., Y.J., J.W.J., K.P.; Writing - review & editing: J.M.K., K.P.; Visualization: K.P.; Supervision: J.M.K., K.P.; Project administration: J.M.K., K.P.; Funding acquisition: K.P.

## Funding

This work was supported by a National Research Foundation of Korea grant (NRF-2018R1A2B3005113) at Seoul National University.

## Data availability

RNA-seq data have been deposited in GEO under accession number GSE137928.

## Supplementary information

Supplementary information available online at <https://dev.biologists.org/lookup/doi/10.1242/dev.190785.supplemental>

## Peer review history

The peer review history is available online at <https://dev.biologists.org/lookup/doi/10.1242/dev.190785.reviewer-comments.pdf>

## References

- Affolter, M., Bellusci, S., Itoh, N., Thiery, J.-P. and Werb, Z.** (2003). Tube or not tube: remodeling epithelial tissues by branching morphogenesis. *Dev. Cell* **4**, 11-18. doi:10.1016/S1534-5807(02)00410-0
- Aragona, M., Panciera, T., Manfrin, A., Giullitti, S., Michielin, F., Elvassore, N., Dupont, S. and Piccolo, S.** (2013). A mechanical checkpoint controls multicellular growth through YAP/TAZ regulation by actin-processing factors. *Cell* **154**, 1047-1059. doi:10.1016/j.cell.2013.07.042
- Barak, H. and Boyle, S. C.** (2011). Organ culture and immunostaining of mouse embryonic kidneys. *Cold Spring Harb. Protoc.* **2011**, pdb prot5558. doi:10.1101/pdb.prot5558
- Beach, J. R., Licate, L. S., Crish, J. F. and Egelhoff, T. T.** (2011). Analysis of the role of Ser1/Ser2/Thr9 phosphorylation on myosin II assembly and function in live cells. *BMC Cell Biol.* **12**, 52. doi:10.1186/1471-2121-12-52
- Bruce, D. and Lucas, T. K.** (1981). An iterative image registration technique with an application to stereo vision. Proceedings of the 7th international joint conference on Artificial intelligence **2**, 674-679.
- Cadigan, K. M. and Nusse, R.** (1997). Wnt signaling: a common theme in animal development. *Genes Dev.* **11**, 3286-3305. doi:10.1101/gad.11.24.3286
- Case, L. B. and Waterman, C. M.** (2015). Integration of actin dynamics and cell adhesion by a three-dimensional, mechanosensitive molecular clutch. *Nat. Cell Biol.* **17**, 955-963. doi:10.1038/ncb3191
- Daley, W. P., Gulfo, K. M., Sequeira, S. J. and Larsen, M.** (2009). Identification of a mechanochemical checkpoint and negative feedback loop regulating branching morphogenesis. *Dev. Biol.* **336**, 169-182. doi:10.1016/j.ydbio.2009.09.037
- Del Moral, P.-M. and Warburton, D.** (2010). Explant culture of mouse embryonic whole lung, isolated epithelium, or mesenchyme under chemically defined conditions as a system to evaluate the molecular mechanism of branching morphogenesis and cellular differentiation. *Methods Mol. Biol.* **633**, 71-79. doi:10.1007/978-1-59745-019-5\_5
- Diamond, S. L., Sharefkin, J. B., Dieffenbach, C., Frasier-Scott, K., McIntire, L. V. and Eskin, S. G.** (1990). Tissue plasminogen activator messenger RNA levels increase in cultured human endothelial cells exposed to laminar shear stress. *J. Cell. Physiol.* **143**, 364-371. doi:10.1002/jcp.1041430222
- Dupont, S., Morsut, L., Aragona, M., Enzo, E., Giullitti, S., Cordenosi, M., Zanconato, F., Le Digabel, J., Forcato, M., Bicciato, S. et al.** (2011). Role of YAP/TAZ in mechanotransduction. *Nature* **474**, 179-183. doi:10.1038/nature10137
- Dzamba, B. J. and DeSimone, D. W.** (2018). Extracellular matrix (ECM) and the sculpting of embryonic tissues. *Curr. Top. Dev. Biol.* **130**, 245-274. doi:10.1016/bs.ctdb.2018.03.006
- Elosegui-Artola, A., Oria, R., Chen, Y., Kosmalska, A., Pérez-González, C., Castro, N., Zhu, C., Trepats, X. and Roca-Cusachs, P.** (2016). Mechanical regulation of a molecular clutch defines force transmission and transduction in response to matrix rigidity. *Nat. Cell Biol.* **18**, 540-548. doi:10.1038/ncb3336
- Engler, A. J., Sen, S., Sweeney, H. L. and Discher, D. E.** (2006). Matrix elasticity directs stem cell lineage specification. *Cell* **126**, 677-689. doi:10.1016/j.cell.2006.06.044
- Ewald, A. J., Brenot, A., Duong, M., Chan, B. S. and Werb, Z.** (2008). Collective epithelial migration and cell rearrangements drive mammary branching morphogenesis. *Dev. Cell* **14**, 570-581. doi:10.1016/j.devcel.2008.03.003
- Furukawa, K. T., Yamashita, K., Sakurai, N. and Ohno, S.** (2017). The epithelial circumferential actin belt regulates YAP/TAZ through nucleocytoplasmic shuttling of merlin. *Cell Rep.* **20**, 1435-1447. doi:10.1016/j.celrep.2017.07.032
- Gaete, M., Fons, J. M., Popa, E. M., Chatzeli, L. and Tucker, A. S.** (2015). Epithelial topography for repetitive tooth formation. *Biol. Open* **4**, 1625-1634. doi:10.1242/bio.013672
- Gibson, M. C., Patel, A. B., Nagpal, R. and Perrimon, N.** (2006). The emergence of geometric order in proliferating metazoan epithelia. *Nature* **442**, 1038-1041. doi:10.1038/nature05014
- Gorfinkiel, N. and Blanchard, G. B.** (2011). Dynamics of actomyosin contractile activity during epithelial morphogenesis. *Curr. Opin. Cell Biol.* **23**, 531-539. doi:10.1016/j.cob.2011.06.002
- Greggio, C., De Franceschi, F., Figueiredo-Larsen, M., Gobaa, S., Ranga, A., Semb, H., Lutolf, M. and Grapin-Botton, A.** (2013). Artificial three-dimensional niches deconstruct pancreas development in vitro. *Development* **140**, 4452-4462. doi:10.1242/dev.096628
- Guillot, C. and Lecuit, T.** (2013). Mechanics of epithelial tissue homeostasis and morphogenesis. *Science* **340**, 1185-1189. doi:10.1126/science.1235249
- Hannezo, E., Prost, J. and Joanny, J.-F.** (2014). Theory of epithelial sheet morphology in three dimensions. *Proc. Natl. Acad. Sci. USA* **111**, 27-32. doi:10.1073/pnas.1312076111
- Harunaga, J., Hsu, J. C. and Yamada, K. M.** (2011). Dynamics of salivary gland morphogenesis. *J. Dent. Res.* **90**, 1070-1077. doi:10.1177/0022034511405330
- Hatton, J. P., Pooran, M., Li, C.-F., Luzzio, C. and Hughes-Fulford, M.** (2003). A short pulse of mechanical force induces gene expression and growth in MC3T3-E1 osteoblasts via an ERK 1/2 pathway. *J. Bone Miner. Res.* **18**, 58-66. doi:10.1359/jbmr.2003.18.1.58
- He, L., Wang, X., Tang, H. L. and Montell, D. J.** (2010). Tissue elongation requires oscillating contractions of a basal actomyosin network. *Nat. Cell Biol.* **12**, 1133-1142. doi:10.1038/ncb2124
- Kim, H. Y. and Nelson, C. M.** (2012). Extracellular matrix and cytoskeletal dynamics during branching morphogenesis. *Organogenesis* **8**, 56-64. doi:10.4161/org.19813
- Kim, H. Y., Pang, M.-F., Varner, V. D., Kojima, L., Miller, E., Radisky, D. C. and Nelson, C. M.** (2015). Localized smooth muscle differentiation is essential for epithelial bifurcation during branching morphogenesis of the mammalian lung. *Dev. Cell* **34**, 719-726. doi:10.1016/j.devcel.2015.08.012
- Kim, J. M., Choi, S., Lee, S. W. and Park, K.** (2018). Voltage-dependent Ca<sup>2+</sup> channels promote branching morphogenesis of salivary glands by patterning differential growth. *Sci. Rep.* **8**, 7566. doi:10.1038/s41598-018-25957-w
- Leong, K. G., Wang, B.-E., Johnson, L. and Gao, W.-Q.** (2008). Generation of a prostate from a single adult stem cell. *Nature* **456**, 804-808. doi:10.1038/nature07427
- Li, R. and Gundersen, G. G.** (2008). Beyond polymer polarity: how the cytoskeleton builds a polarized cell. *Nat. Rev. Mol. Cell Biol.* **9**, 860-873. doi:10.1038/nrm2522
- Lin, C., Yao, E., Zhang, K., Jiang, X., Croll, S., Thompson-Peer, K. and Chuang, P.-T.** (2017). YAP is essential for mechanical force production and epithelial cell proliferation during lung branching morphogenesis. *eLife* **6**, e21130. doi:10.7554/eLife.21130
- Lombaert, I. M. A., Abrams, S. R., Li, L., Eswarakumar, V. P., Sethi, A. J., Witt, R. L. and Hoffman, M. P.** (2013). Combined KIT and FGFR2b signaling regulates epithelial progenitor expansion during organogenesis. *Stem Cell Rep.* **1**, 604-619. doi:10.1016/j.stemcr.2013.10.013
- Lu, P. and Werb, Z.** (2008). Patterning mechanisms of branched organs. *Science* **322**, 1506-1509. doi:10.1126/science.1162783
- Mao, T., Kusefoglu, D., Hooks, B. M., Huber, D., Petreanu, L. and Svoboda, K.** (2011). Long-range neuronal circuits underlying the interaction between sensory and motor cortex. *Neuron* **72**, 111-123. doi:10.1016/j.neuron.2011.07.029
- Martens, J. C. and Radmacher, M.** (2008). Softening of the actin cytoskeleton by inhibition of myosin II. *Pflügers Arch - Eur. J. Physiol.* **456**, 95-100. doi:10.1007/s00424-007-0419-8
- Maruthamuthu, V., Aratyn-Schaus, Y. and Gardel, M. L.** (2010). Conserved F-actin dynamics and force transmission at cell adhesions. *Curr. Opin. Cell Biol.* **22**, 583-588. doi:10.1016/j.cob.2010.07.010

- Meng, Z., Qiu, Y., Lin, K. C., Kumar, A., Placone, J. K., Fang, C., Wang, K.-C., Lu, S., Pan, M., Hong, A. W. et al. (2018). RAP2 mediates mechanoresponses of the Hippo pathway. *Nature* **560**, 655-660. doi:10.1038/s41586-018-0444-0
- Meyer, T. N., Schwesinger, C., Bush, K. T., Stuart, R. O., Rose, D. W., Shah, M. M., Vaughn, D. A., Steer, D. L. and Nigam, S. K. (2004). Spatiotemporal regulation of morphogenetic molecules during in vitro branching of the isolated ureteric bud: toward a model of branching through budding in the developing kidney. *Dev. Biol.* **275**, 44-67. doi:10.1016/j.ydbio.2004.07.022
- Moore, K. A., Polte, T., Huang, S., Shi, B., Alsberg, E., Sunday, M. E. and Ingber, D. E. (2005). Control of basement membrane remodeling and epithelial branching morphogenesis in embryonic lung by Rho and cytoskeletal tension. *Dev. Dyn.* **232**, 268-281. doi:10.1002/dvdy.20237
- Nedvetsky, P. I., Emmerson, E., Finley, J. K., Ettinger, A., Cruz-Pacheco, N., Prochazka, J., Haddox, C. L., Northrup, E., Hodges, C., Mostov, K. E. et al. (2014). Parasympathetic innervation regulates tubulogenesis in the developing salivary gland. *Dev. Cell* **30**, 449-462. doi:10.1016/j.devcel.2014.06.012
- Nelson, C. M. (2016). On Buckling Morphogenesis. *J. Biomech. Eng.* **138**, 021005. doi:10.1115/1.4032128
- Nishita, M., Hashimoto, M. K., Ogata, S., Laurent, M. N., Ueno, N., Shibuya, H. and Cho, K. W. Y. (2000). Interaction between Wnt and TGF- $\beta$  signalling pathways during formation of Spemann's organizer. *Nature* **403**, 781-785. doi:10.1038/35001602
- Nogawa, H. and Takahashi, Y. (1991). Substitution for mesenchyme by basement-membrane-like substratum and epidermal growth factor in inducing branching morphogenesis of mouse salivary epithelium. *Development* **112**, 855-861.
- Onodera, T., Sakai, T., Hsu, J. C.-F., Matsumoto, K., Chiorini, J. A. and Yamada, K. M. (2010). Btd7 regulates epithelial cell dynamics and branching morphogenesis. *Science* **329**, 562-565. doi:10.1126/science.1191880
- Otsu, N. (1979). A threshold selection method from gray-level histograms. *IEEE Trans. Syst. Man Cybern.* **9**, 62-66. doi:10.1109/TSMC.1979.4310076
- Paszek, M. J., Zahir, N., Johnson, K. R., Lakins, J. N., Rozenberg, G. I., Gefen, A., Reinhart-King, C. A., Margulies, S. S., Dembo, M., Boettiger, D. et al. (2005). Tensional homeostasis and the malignant phenotype. *Cancer Cell* **8**, 241-254. doi:10.1016/j.ccr.2005.08.010
- Rauzi, M., Lenne, P.-F. and Lecuit, T. (2010). Planar polarized actomyosin contractile flows control epithelial junction remodelling. *Nature* **468**, 1110-1114. doi:10.1038/nature09566
- Ray, S., Yuan, D., Dhulekar, N., Oztan, B., Yener, B. and Larsen, M. (2013). Cell-based multi-parametric model of cleft progression during submandibular salivary gland branching morphogenesis. *PLoS Comput. Biol.* **9**, e1003319. doi:10.1371/journal.pcbi.1003319
- Rebustini, I. T. and Hoffman, M. P. (2009). ECM and FGF-dependent assay of embryonic SMG epithelial morphogenesis: investigating growth factor/matrix regulation of gene expression during submandibular gland development. *Methods Mol. Biol.* **522**, 319-330. doi:10.1007/978-1-59745-413-1\_21
- Reginensi, A., Enderle, L., Gregorieff, A., Johnson, R. L., Wrana, J. L. and McNeill, H. (2016). A critical role for NF2 and the Hippo pathway in branching morphogenesis. *Nat. Commun.* **7**, 12309. doi:10.1038/ncomms12309
- Rysä, J., Tokola, H. and Ruskoaho, H. (2018). Mechanical stretch induced transcriptomic profiles in cardiac myocytes. *Sci. Rep.* **8**, 4733. doi:10.1038/s41598-018-23042-w
- Sakai, T., Larsen, M. and Yamada, K. M. (2003). Fibronectin requirement in branching morphogenesis. *Nature* **423**, 876-881. doi:10.1038/nature01712
- Schindelin, J., Arganda-Carreras, I., Frise, E., Kaynig, V., Longair, M., Pietzsch, T., Preibisch, S., Rueden, C., Saalfeld, S., Schmid, B. et al. (2012). Fiji: an open-source platform for biological-image analysis. *Nat. Methods* **9**, 676-682. doi:10.1038/nmeth.2019
- Szymaniak, A. D., Mi, R., McCarthy, S. E., Gower, A. C., Reynolds, T. L., Mingueau, M., Kukuruzinska, M. and Varelas, X. (2017). The Hippo pathway effector YAP is an essential regulator of ductal progenitor patterning in the mouse submandibular gland. *eLife* **6**, e23499. doi:10.7554/eLife.23499
- Tang, N., Marshall, W. F., McMahon, M., Metzger, R. J. and Martin, G. R. (2011). Control of mitotic spindle angle by the RAS-regulated ERK1/2 pathway determines lung tube shape. *Science* **333**, 342-345. doi:10.1126/science.1204831
- Totaro, A., Panciera, T. and Piccolo, S. (2018). YAP/TAZ upstream signals and downstream responses. *Nat. Cell Biol.* **20**, 888-899. doi:10.1038/s41556-018-0142-z
- Vassilev, A., Kaneko, K. J., Shu, H., Zhao, Y. and DePamphilis, M. L. (2001). TEAD/TEF transcription factors utilize the activation domain of YAP65, a Src/Yes-associated protein localized in the cytoplasm. *Genes Dev.* **15**, 1229-1241. doi:10.1101/gad.888601
- Vicente-Manzanares, M., Koach, M. A., Whitmore, L., Lamers, M. L. and Horwitz, A. F. (2008). Segregation and activation of myosin IIB creates a rear in migrating cells. *J. Cell Biol.* **183**, 543-554. doi:10.1083/jcb.200806030
- Voutilainen, M., Lindfors, P. H. and Mikkola, M. L. (2013). Protocol: ex vivo culture of mouse embryonic mammary buds. *J. Mammary Gland Biol. Neoplasia* **18**, 239-245. doi:10.1007/s10911-013-9288-2
- Won, J., Vang, H., Lee, P. R., Kim, Y. H., Kim, H. W., Kang, Y. and Oh, S. B. (2017). Piezo2 expression in mechanosensitive dental primary afferent neurons. *J. Dent. Res.* **96**, 931-937. doi:10.1177/0022034517702342
- Yang, H. W., Collins, S. R. and Meyer, T. (2016). Locally excitable Cdc42 signals steer cells during chemotaxis. *Nat. Cell Biol.* **18**, 191-201. doi:10.1038/ncb3292
